# Supplementary material
Source: PubMed Central journal article supplement (PMC3185332)
Supplement: NIHMS36667-supplement-1.pdf [file NIHMS36667-supplement-1.pdf]

**a****Mouse *DNase1L2* locus**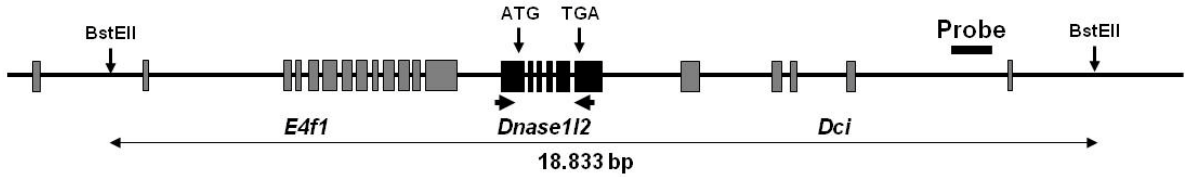**Targeting vector**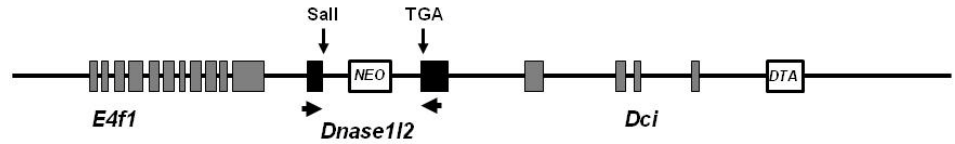**Recombined locus**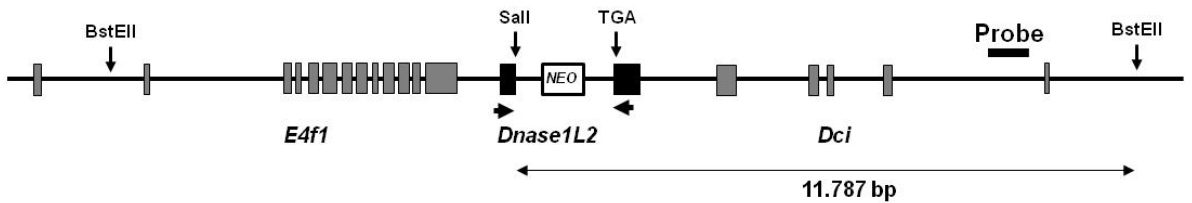**b**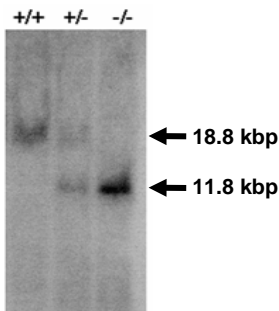**c**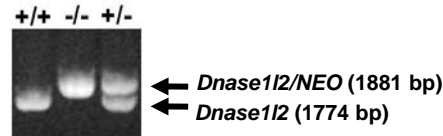**d**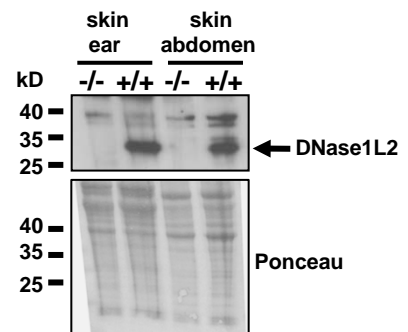**Supplementary Figure S1. Targeted deletion of the *Dnase1l2* gene in the mouse. (a)**

Construction of the targeting vector. Exons 2-6 of the *Dnase1l2* gene including start (ATG) and stop (TGA) codons were replaced by a neomycin resistance cassette. *DTA*, *Clostridium diphtheriae* A toxin gene; *Dci*, dodecenoyl-coenzyme A delta isomerase gene; *E4f1*, E4f transcription factor 1 gene; kbp, kilobasepairs; *NEO*, neomycin resistance gene. (b) ES clones were screened by Southern-blotting of genomic DNA digested with *BstEII* and *SalI* using a radioactively labeled probe that hybridized with a site depicted in panel a. (c) PCR-screening of DNA from *DNase1L2*<sup>+/+</sup>, *DNase1L2*<sup>+/-</sup>, and *DNase1L2*<sup>-/-</sup> mice using a primer pair indicated by arrows in panel a. (d) Western blot analysis for DNase1L2 in skin lysates from the ear and abdomen of *DNase1L2*<sup>+/+</sup> and *DNase1L2*<sup>-/-</sup> mice (upper panel). A rabbit antiserum against murine DNase1L2 was used as first step reagent. The antiserum against DNase1L2 was produced by immunizing rabbits with a purified recombinant protein corresponding to amino acids 61-278 of murine DNase1L2 derived from *e. coli*. Equal protein loading was demonstrated by Ponceau staining of the membrane (lower panel).

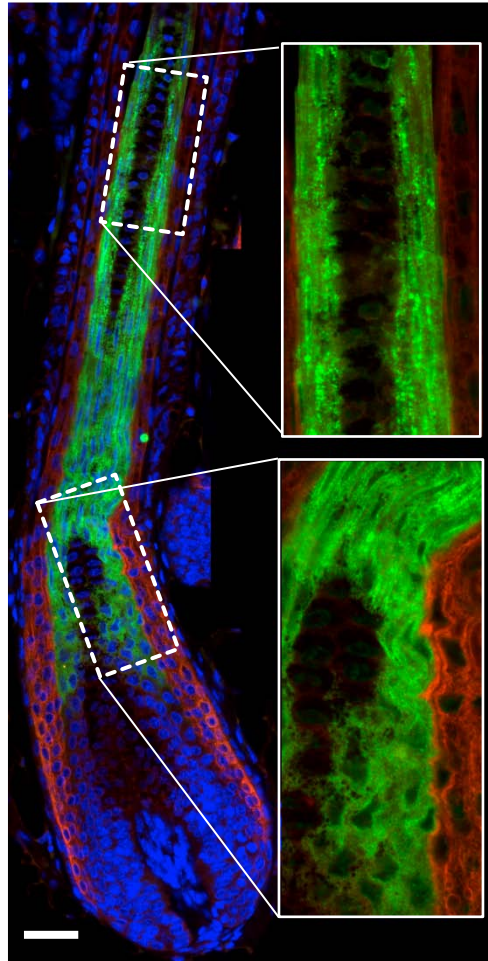

blue: Hoechst; green: DNase1L2; red: keratin 28

**Supplementary Figure S2. Immunolocalization of DNase1L2 in the hair follicle.**

Immunofluorescence co-labelling of DNase1L2 (green) and keratin 28 (red), a specific marker of the inner root sheath. Nuclei were counterstained by Hoechst 33258 (blue). Scale bars: 40  $\mu\text{m}$ .

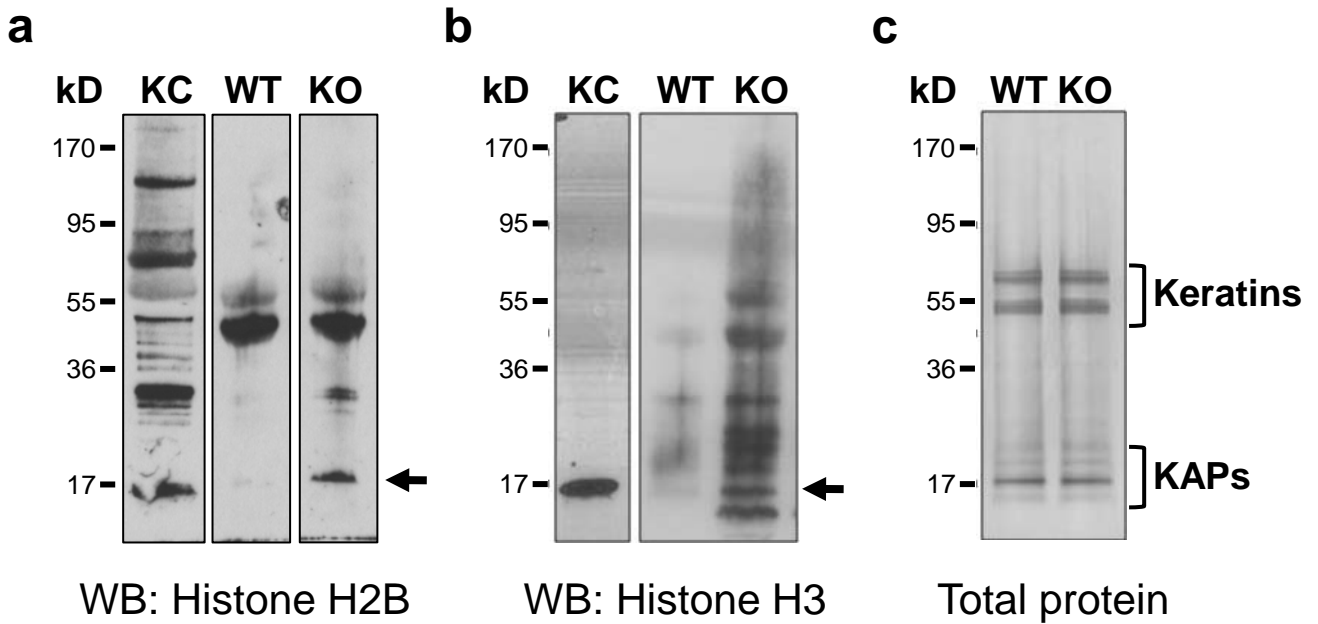

**Supplementary Figure S3. Protein composition of hair from wild-type and DNase1L2 knockout mice.** Western blot analysis of histones H2B (a) and H3 (b) in hair. Each lane was loaded with a total protein amount proportional to that in the gel of panel c. Lysates were made by homogenizing 10 mg hair in a Precellys®24 bead mill containing 10 ceramic beads of a diameter of 1.4 mm for 2x50 seconds at 6500 rpm, followed by incubation in lysis buffer (8% SDS, 4% mercaptoethanol, 50 mM Tris-HCl, pH 6.8) at 95°C for 10 minutes. As a positive control, a lysate of cultured keratinocytes (KC) was run in parallel. Arrows indicate the positions of the histones as predicted from their molecular weight. (c) Electrophoretic separation and silver staining of proteins in representative hair lysates from DNase1L2-deficient and wild-type mice revealed no major differences in protein composition. The positions of bands corresponding to the main structural proteins of hair, i.e. keratins and keratin-associated proteins (KAPs), are indicated on the right. The positions of molecular weight markers (kD, kilo Daltons) are indicated on the left.
